# Supplementary material for: Reduced Level of Tear Antimicrobial and Immunomodulatory Proteins as a Possible Reason for Higher Ocular Infections in Diabetic Patients
Source: MDPI journal article supplement (doi:10.3390/pathogens10070883), 2021-07-12
Supplement: s1 [file s1]

| Time<br>(h) | Control            |       | Healthy            |       | DM                 |       | NPDR               |       | PDR                |       | P – value (Mann Whitney U-test) |                    |                      |                     |                    |                      |                     |                 |                |                  |
|-------------|--------------------|-------|--------------------|-------|--------------------|-------|--------------------|-------|--------------------|-------|---------------------------------|--------------------|----------------------|---------------------|--------------------|----------------------|---------------------|-----------------|----------------|------------------|
|             | Mean<br>absorbance | SD    | Control<br>-<br>Healthy         | Control<br>-<br>DM | Control<br>-<br>NPDR | Control<br>-<br>PDR | Healthy<br>-<br>DM | Healthy<br>-<br>NPDR | Healthy<br>-<br>PDR | DM<br>-<br>NPDR | DM<br>-<br>PDR | NPDR<br>-<br>PDR |
| 0           | 0,003              | 0,002 | 0,006              | 0,001 | 0,005              | 0,003 | 0,006              | 0,001 | 0,006              | 0,001 | 0,099                           | 0,268              | 0,099                | 0,099               | 0,369              | 1,000                | 1,000               | 0,369           | 0,369          | 1,000            |
| 0,5         | 0,004              | 0,002 | 0,009              | 0,002 | 0,008              | 0,001 | 0,007              | 0,002 | 0,008              | 0,001 | <b>0,049</b>                    | <b>0,049</b>       | 0,077                | <b>0,046</b>        | 0,261              | 0,261                | 0,346               | 0,822           | 0,637          | 0,637            |
| 1           | 0,008              | 0,002 | 0,014              | 0,002 | 0,012              | 0,001 | 0,012              | 0,001 | 0,012              | 0,001 | <b>0,046</b>                    | <b>0,046</b>       | <b>0,046</b>         | <b>0,049</b>        | 0,099              | 0,099                | 0,105               | 0,361           | 0,637          | 0,637            |
| 1,5         | 0,022              | 0,002 | 0,028              | 0,001 | 0,027              | 0,001 | 0,027              | 0,001 | 0,025              | 0,001 | <b>0,043</b>                    | <b>0,043</b>       | <b>0,043</b>         | <b>0,043</b>        | 0,796              | 0,099                | <b>0,043</b>        | 0,361           | 0,068          | 0,068            |
| 2           | 0,052              | 0,002 | 0,050              | 0,002 | 0,052              | 0,001 | 0,050              | 0,001 | 0,046              | 0,002 | 0,268                           | 0,653              | 0,105                | <b>0,049</b>        | 0,197              | 0,500                | 0,121               | 0,043           | <b>0,046</b>   | <b>0,046</b>     |
| 2,5         | 0,089              | 0,004 | 0,071              | 0,002 | 0,076              | 0,003 | 0,073              | 0,002 | 0,062              | 0,003 | <b>0,049</b>                    | <b>0,049</b>       | <b>0,049</b>         | <b>0,049</b>        | <b>0,049</b>       | 0,184                | <b>0,049</b>        | 0,184           | <b>0,049</b>   | <b>0,049</b>     |
| 3           | 0,130              | 0,008 | 0,095              | 0,003 | 0,106              | 0,008 | 0,096              | 0,004 | 0,073              | 0,003 | <b>0,049</b>                    | <b>0,049</b>       | <b>0,049</b>         | <b>0,046</b>        | <b>0,049</b>       | 0,658                | <b>0,046</b>        | 0,127           | <b>0,046</b>   | <b>0,046</b>     |
| 3,5         | 0,188              | 0,014 | 0,119              | 0,006 | 0,144              | 0,014 | 0,122              | 0,008 | 0,086              | 0,005 | <b>0,046</b>                    | <b>0,046</b>       | <b>0,046</b>         | <b>0,046</b>        | <b>0,049</b>       | 0,658                | <b>0,049</b>        | 0,077           | <b>0,049</b>   | <b>0,049</b>     |
| 4           | 0,258              | 0,008 | 0,141              | 0,005 | 0,200              | 0,027 | 0,158              | 0,013 | 0,101              | 0,004 | <b>0,046</b>                    | <b>0,046</b>       | <b>0,046</b>         | <b>0,046</b>        | <b>0,049</b>       | <b>0,049</b>         | <b>0,049</b>        | 0,077           | <b>0,049</b>   | <b>0,049</b>     |
| 4,5         | 0,284              | 0,023 | 0,170              | 0,007 | 0,266              | 0,032 | 0,240              | 0,026 | 0,129              | 0,011 | <b>0,049</b>                    | 0,275              | 0,127                | <b>0,049</b>        | <b>0,049</b>       | <b>0,049</b>         | <b>0,049</b>        | 0,275           | <b>0,049</b>   | <b>0,049</b>     |
| 5           | 0,307              | 0,011 | 0,197              | 0,008 | 0,317              | 0,015 | 0,305              | 0,014 | 0,173              | 0,021 | <b>0,049</b>                    | 0,275              | 0,827                | <b>0,049</b>        | <b>0,049</b>       | <b>0,049</b>         | 0,127               | 0,275           | <b>0,049</b>   | <b>0,049</b>     |
| 5,5         | 0,321              | 0,014 | 0,227              | 0,009 | 0,347              | 0,025 | 0,336              | 0,019 | 0,242              | 0,051 | <b>0,049</b>                    | 0,275              | 0,275                | <b>0,049</b>        | <b>0,049</b>       | <b>0,049</b>         | 0,827               | 0,376           | <b>0,049</b>   | <b>0,049</b>     |
| 6           | 0,341              | 0,020 | 0,267              | 0,013 | 0,344              | 0,025 | 0,329              | 0,022 | 0,296              | 0,052 | <b>0,049</b>                    | 0,827              | 0,275                | 0,275               | <b>0,049</b>       | <b>0,049</b>         | 0,513               | 0,275           | 0,275          | 0,275            |
| 6,5         | 0,354              | 0,012 | 0,344              | 0,029 | 0,347              | 0,022 | 0,333              | 0,011 | 0,343              | 0,052 | 0,827                           | 0,827              | 0,127                | 0,513               | 0,827              | 0,513                | 0,513               | 0,513           | 0,513          | 0,513            |
| 7           | 0,307              | 0,006 | 0,382              | 0,023 | 0,290              | 0,006 | 0,283              | 0,014 | 0,334              | 0,018 | <b>0,049</b>                    | <b>0,049</b>       | <b>0,049</b>         | <b>0,049</b>        | <b>0,049</b>       | <b>0,049</b>         | <b>0,049</b>        | 0,513           | <b>0,049</b>   | <b>0,049</b>     |
| 7,5         | 0,327              | 0,012 | 0,404              | 0,022 | 0,306              | 0,015 | 0,300              | 0,014 | 0,343              | 0,015 | <b>0,049</b>                    | 0,275              | <b>0,049</b>         | 0,275               | <b>0,049</b>       | <b>0,049</b>         | <b>0,049</b>        | 0,513           | <b>0,049</b>   | <b>0,049</b>     |
| 8           | 0,353              | 0,015 | 0,447              | 0,034 | 0,343              | 0,009 | 0,339              | 0,017 | 0,384              | 0,034 | <b>0,049</b>                    | 0,275              | 0,275                | 0,127               | <b>0,049</b>       | <b>0,049</b>         | 0,127               | 0,513           | 0,127          | 0,127            |
| 8,5         | 0,347              | 0,028 | 0,448              | 0,017 | 0,334              | 0,021 | 0,340              | 0,029 | 0,384              | 0,027 | <b>0,049</b>                    | 0,268              | 0,376                | 0,127               | <b>0,049</b>       | <b>0,049</b>         | <b>0,049</b>        | 0,507           | <b>0,046</b>   | <b>0,049</b>     |
| 9           | 0,379              | 0,010 | 0,503              | 0,058 | 0,365              | 0,009 | 0,366              | 0,009 | 0,421              | 0,022 | <b>0,049</b>                    | 0,127              | 0,127                | <b>0,049</b>        | <b>0,049</b>       | <b>0,049</b>         | <b>0,049</b>        | 0,827           | <b>0,049</b>   | <b>0,049</b>     |
| 9,5         | 0,359              | 0,015 | 0,476              | 0,089 | 0,334              | 0,027 | 0,339              | 0,017 | 0,415              | 0,039 | <b>0,049</b>                    | 0,275              | 0,275                | <b>0,049</b>        | <b>0,049</b>       | <b>0,049</b>         | 0,275               | 0,513           | <b>0,049</b>   | <b>0,049</b>     |
| 10          | 0,369              | 0,035 | 0,478              | 0,104 | 0,346              | 0,032 | 0,341              | 0,026 | 0,426              | 0,071 | 0,268                           | 0,268              | 0,268                | 0,268               | 0,127              | <b>0,049</b>         | 0,275               | 0,658           | 0,275          | 0,275            |

Table S1: Antimicrobial activity of tears against *Staphylococcus aureus* ATCC 29213 strain. The mean absorbance and SD values are indicated along with the calculated p-values from the Mann Whitney U-test. Bold values represent significant differences between the groups (p≤0,05).
