# Supplementary material for: Reduced Level of Tear Antimicrobial and Immunomodulatory Proteins as a Possible Reason for Higher Ocular Infections in Diabetic Patients
Source: MDPI journal article supplement (doi:10.3390/pathogens10070883), 2021-07-12
Supplement: s1 [file s1]

| Time<br>(h) | Control            |       | Healthy            |       | DM                 |       | NPDR               |       | PDR                |       | P – value (Mann Whitney U-test) |                    |                      |                     |                    |                      |                     |                 |                |                  |
|-------------|--------------------|-------|--------------------|-------|--------------------|-------|--------------------|-------|--------------------|-------|---------------------------------|--------------------|----------------------|---------------------|--------------------|----------------------|---------------------|-----------------|----------------|------------------|
|             | Mean<br>absorbance | SD    | Control<br>-<br>Healthy         | Control<br>-<br>DM | Control<br>-<br>NPDR | Control<br>-<br>PDR | Healthy<br>-<br>DM | Healthy<br>-<br>NPDR | Healthy<br>-<br>PDR | DM<br>-<br>NPDR | DM<br>-<br>PDR | NPDR<br>-<br>PDR |
| 0           | 0,014              | 0,002 | 0,019              | 0,003 | 0,018              | 0,004 | 0,022              | 0,008 | 0,017              | 0,006 | <b>0,046</b>                    | 0,197              | 0,268                | 0,369               | 0,369              | 0,513                | 0,513               | 0,507           | 0,825          | 0,275            |
| 0,5         | 0,019              | 0,002 | 0,026              | 0,001 | 0,024              | 0,001 | 0,026              | 0,005 | 0,028              | 0,009 | <b>0,049</b>                    | <b>0,046</b>       | 0,077                | 0,127               | 0,105              | 0,513                | 0,658               | 0,507           | 0,507          | 0,827            |
| 1           | 0,038              | 0,004 | 0,045              | 0,003 | 0,043              | 0,002 | 0,046              | 0,003 | 0,042              | 0,002 | 0,077                           | 0,127              | 0,072                | 0,268               | 0,275              | 0,369                | 0,121               | 0,268           | 0,637          | 0,116            |
| 1,5         | 0,073              | 0,003 | 0,085              | 0,005 | 0,084              | 0,003 | 0,086              | 0,005 | 0,082              | 0,002 | <b>0,046</b>                    | <b>0,046</b>       | <b>0,046</b>         | <b>0,046</b>        | 0,513              | 0,827                | 0,513               | 0,658           | 0,376          | 0,184            |
| 2           | 0,123              | 0,005 | 0,139              | 0,005 | 0,142              | 0,004 | 0,142              | 0,005 | 0,136              | 0,002 | <b>0,049</b>                    | <b>0,049</b>       | <b>0,049</b>         | <b>0,049</b>        | 0,376              | 0,658                | 0,513               | 0,827           | 0,127          | 0,077            |
| 2,5         | 0,191              | 0,004 | 0,202              | 0,008 | 0,220              | 0,019 | 0,217              | 0,017 | 0,213              | 0,017 | <b>0,049</b>                    | <b>0,049</b>       | <b>0,049</b>         | <b>0,049</b>        | 0,127              | 0,275                | 0,513               | 0,827           | 0,513          | 0,658            |
| 3           | 0,254              | 0,023 | 0,269              | 0,022 | 0,227              | 0,005 | 0,249              | 0,010 | 0,231              | 0,028 | 0,275                           | 0,127              | 0,513                | 0,268               | <b>0,049</b>       | 0,275                | 0,268               | <b>0,049</b>    | 0,507          | 0,268            |
| 3,5         | 0,262              | 0,030 | 0,312              | 0,040 | 0,274              | 0,012 | 0,304              | 0,022 | 0,285              | 0,048 | 0,275                           | 0,827              | 0,127                | 0,275               | 0,275              | 0,513                | 0,275               | 0,127           | 0,513          | 0,827            |
| 4           | 0,352              | 0,016 | 0,311              | 0,031 | 0,271              | 0,024 | 0,302              | 0,017 | 0,275              | 0,033 | 0,127                           | <b>0,049</b>       | <b>0,049</b>         | <b>0,049</b>        | 0,184              | 0,658                | 0,275               | 0,184           | 0,827          | 0,275            |
| 4,5         | 0,310              | 0,049 | 0,305              | 0,024 | 0,271              | 0,018 | 0,300              | 0,031 | 0,277              | 0,042 | 0,513                           | 0,275              | 0,827                | 0,275               | <b>0,049</b>       | 0,827                | 0,275               | 0,184           | 0,827          | 0,275            |
| 5           | 0,341              | 0,003 | 0,334              | 0,014 | 0,303              | 0,024 | 0,326              | 0,012 | 0,301              | 0,006 | 0,658                           | <b>0,049</b>       | 0,127                | <b>0,049</b>        | 0,127              | 0,658                | <b>0,049</b>        | 0,275           | 0,827          | <b>0,049</b>     |
| 5,5         | 0,343              | 0,026 | 0,332              | 0,037 | 0,301              | 0,023 | 0,328              | 0,028 | 0,301              | 0,045 | 0,827                           | 0,127              | 0,827                | 0,275               | 0,275              | 0,827                | 0,376               | 0,184           | 0,827          | 0,275            |
| 6           | 0,323              | 0,017 | 0,330              | 0,012 | 0,299              | 0,023 | 0,322              | 0,021 | 0,293              | 0,014 | 0,275                           | 0,127              | 1,000                | 0,127               | 0,127              | 0,275                | <b>0,049</b>        | 0,127           | 0,827          | 0,127            |
| 6,5         | 0,339              | 0,014 | 0,359              | 0,038 | 0,322              | 0,023 | 0,342              | 0,028 | 0,318              | 0,041 | 0,513                           | 0,275              | 0,827                | 0,513               | 0,127              | 0,513                | 0,261               | 0,275           | 0,827          | 0,513            |
| 7           | 0,305              | 0,020 | 0,329              | 0,010 | 0,301              | 0,003 | 0,319              | 0,004 | 0,291              | 0,013 | 0,127                           | 0,827              | 0,513                | 0,268               | <b>0,049</b>       | 0,127                | <b>0,046</b>        | <b>0,049</b>    | <b>0,046</b>   | 0,046            |
| 7,5         | 0,330              | 0,022 | 0,371              | 0,022 | 0,336              | 0,026 | 0,354              | 0,022 | 0,323              | 0,017 | 0,127                           | 0,658              | 0,275                | 0,275               | 0,127              | 0,275                | <b>0,049</b>        | 0,275           | 0,275          | 0,275            |
| 8           | 0,367              | 0,042 | 0,415              | 0,042 | 0,375              | 0,038 | 0,391              | 0,029 | 0,361              | 0,033 | 0,127                           | 0,827              | 0,513                | 0,827               | 0,275              | 0,275                | 0,275               | 0,275           | 0,275          | 0,275            |
| 8,5         | 0,361              | 0,049 | 0,369              | 0,019 | 0,336              | 0,021 | 0,349              | 0,013 | 0,320              | 0,012 | 0,513                           | 0,827              | 0,827                | 0,127               | 0,127              | 0,275                | <b>0,049</b>        | 0,275           | 0,275          | <b>0,049</b>     |
| 9           | 0,396              | 0,027 | 0,357              | 0,006 | 0,324              | 0,002 | 0,338              | 0,009 | 0,307              | 0,012 | <b>0,046</b>                    | <b>0,049</b>       | <b>0,049</b>         | <b>0,049</b>        | <b>0,046</b>       | <b>0,046</b>         | <b>0,046</b>        | <b>0,049</b>    | <b>0,049</b>   | <b>0,049</b>     |
| 9,5         | 0,389              | 0,016 | 0,401              | 0,051 | 0,358              | 0,041 | 0,369              | 0,038 | 0,341              | 0,043 | 0,827                           | 0,275              | 0,513                | 0,275               | 0,513              | 0,513                | 0,127               | 0,658           | 0,513          | 0,275            |
| 10          | 0,417              | 0,024 | 0,419              | 0,007 | 0,373              | 0,004 | 0,389              | 0,020 | 0,356              | 0,017 | 0,827                           | <b>0,049</b>       | 0,127                | <b>0,049</b>        | <b>0,049</b>       | <b>0,049</b>         | <b>0,049</b>        | 0,184           | 0,184          | 0,077            |

Table S2: Antimicrobial activity of tears against *Escherichia coli* ATCC 26922 strain. The mean absorbance and SD values are indicated along with the calculated p-values from the Mann Whitney U-test. Bold values represent significant differences between the groups (p≤0,05).
