# Supplementary material for: Reduced Level of Tear Antimicrobial and Immunomodulatory Proteins as a Possible Reason for Higher Ocular Infections in Diabetic Patients
Source: MDPI journal article supplement (doi:10.3390/pathogens10070883), 2021-07-12
Supplement: s1 [file s1]

| Time<br>(h) | Control            |       | Healthy            |       | DM                 |       | NPDR               |       | PDR                |       | P – value (Mann Whitney U-test) |                    |                      |                     |                    |                      |                     |                 |                |                  |
|-------------|--------------------|-------|--------------------|-------|--------------------|-------|--------------------|-------|--------------------|-------|---------------------------------|--------------------|----------------------|---------------------|--------------------|----------------------|---------------------|-----------------|----------------|------------------|
|             | Mean<br>absorbance | SD    | Control<br>-<br>Healthy         | Control<br>-<br>DM | Control<br>-<br>NPDR | Control<br>-<br>PDR | Healthy<br>-<br>DM | Healthy<br>-<br>NPDR | Healthy<br>-<br>PDR | DM<br>-<br>NPDR | DM<br>-<br>PDR | NPDR<br>-<br>PDR |
| 0           | 0,004              | 0,002 | 0,011              | 0,005 | 0,009              | 0,004 | 0,009              | 0,005 | 0,011              | 0,002 | <b>0,046</b>                    | 0,127              | 0,127                | <b>0,046</b>        | 0,487              | 0,268                | 0,500               | 1,000           | 0,507          | 0,507            |
| 0,5         | 0,006              | 0,001 | 0,013              | 0,004 | 0,012              | 0,002 | 0,011              | 0,003 | 0,014              | 0,001 | <b>0,046</b>                    | <b>0,046</b>       | <b>0,046</b>         | <b>0,046</b>        | 1,000              | 0,513                | 0,513               | 0,827           | 0,261          | 0,376            |
| 1           | 0,008              | 0,001 | 0,015              | 0,002 | 0,015              | 0,001 | 0,014              | 0,002 | 0,017              | 0,000 | <b>0,046</b>                    | <b>0,046</b>       | <b>0,046</b>         | <b>0,034</b>        | 0,658              | 0,658                | 0,121               | 0,261           | <b>0,037</b>   | <b>0,037</b>     |
| 1,5         | 0,014              | 0,002 | 0,021              | 0,003 | 0,021              | 0,001 | 0,020              | 0,001 | 0,023              | 0,001 | <b>0,049</b>                    | <b>0,046</b>       | <b>0,049</b>         | <b>0,046</b>        | 0,817              | 0,822                | 0,369               | 0,487           | 0,099          | <b>0,046</b>     |
| 2           | 0,023              | 0,002 | 0,031              | 0,003 | 0,031              | 0,001 | 0,030              | 0,001 | 0,032              | 0,001 | <b>0,049</b>                    | <b>0,049</b>       | <b>0,046</b>         | <b>0,049</b>        | 0,658              | 0,637                | 0,513               | 0,105           | 0,261          | <b>0,046</b>     |
| 2,5         | 0,042              | 0,002 | 0,046              | 0,002 | 0,045              | 0,003 | 0,045              | 0,002 | 0,052              | 0,002 | 0,077                           | 0,184              | 0,077                | <b>0,049</b>        | 0,500              | 0,500                | <b>0,049</b>        | 0,658           | <b>0,049</b>   | <b>0,049</b>     |
| 3           | 0,064              | 0,003 | 0,066              | 0,003 | 0,065              | 0,004 | 0,066              | 0,005 | 0,077              | 0,004 | 0,376                           | 0,658              | 0,658                | <b>0,049</b>        | 0,827              | 1,000                | <b>0,049</b>        | 0,658           | <b>0,049</b>   | <b>0,049</b>     |
| 3,5         | 0,093              | 0,003 | 0,093              | 0,004 | 0,091              | 0,005 | 0,096              | 0,007 | 0,110              | 0,009 | 1,000                           | 0,513              | 0,827                | <b>0,049</b>        | 1,000              | 0,658                | <b>0,049</b>        | 0,275           | <b>0,049</b>   | <b>0,049</b>     |
| 4           | 0,137              | 0,003 | 0,135              | 0,007 | 0,133              | 0,010 | 0,138              | 0,011 | 0,159              | 0,014 | 0,822                           | 0,513              | 0,658                | <b>0,049</b>        | 0,827              | 0,827                | <b>0,049</b>        | 0,275           | <b>0,049</b>   | 0,077            |
| 4,5         | 0,215              | 0,007 | 0,203              | 0,010 | 0,200              | 0,012 | 0,208              | 0,014 | 0,243              | 0,019 | 0,105                           | 0,127              | 0,513                | <b>0,049</b>        | 0,825              | 0,825                | <b>0,046</b>        | 0,275           | <b>0,049</b>   | <b>0,049</b>     |
| 5           | 0,314              | 0,011 | 0,309              | 0,014 | 0,296              | 0,016 | 0,323              | 0,017 | 0,375              | 0,033 | 0,827                           | 0,275              | 0,275                | <b>0,046</b>        | 0,275              | 0,513                | <b>0,046</b>        | 0,127           | <b>0,046</b>   | 0,121            |
| 5,5         | 0,396              | 0,010 | 0,409              | 0,026 | 0,390              | 0,037 | 0,419              | 0,030 | 0,454              | 0,035 | 0,513                           | 0,827              | 0,275                | <b>0,049</b>        | 0,827              | 0,513                | 0,275               | 0,513           | <b>0,049</b>   | 0,275            |
| 6           | 0,407              | 0,012 | 0,431              | 0,008 | 0,442              | 0,010 | 0,440              | 0,010 | 0,445              | 0,011 | <b>0,049</b>                    | <b>0,049</b>       | <b>0,049</b>         | <b>0,049</b>        | 0,275              | 0,275                | 0,077               | 0,658           | 0,658          | 0,658            |
| 6,5         | 0,418              | 0,014 | 0,434              | 0,019 | 0,447              | 0,006 | 0,433              | 0,039 | 0,503              | 0,053 | 0,513                           | <b>0,049</b>       | 0,827                | <b>0,049</b>        | 0,513              | 0,513                | <b>0,049</b>        | 0,513           | <b>0,049</b>   | 0,275            |
| 7           | 0,427              | 0,016 | 0,505              | 0,014 | 0,486              | 0,021 | 0,505              | 0,010 | 0,580              | 0,030 | <b>0,049</b>                    | <b>0,049</b>       | <b>0,049</b>         | <b>0,049</b>        | 0,275              | 0,827                | <b>0,049</b>        | 0,275           | <b>0,049</b>   | <b>0,049</b>     |
| 7,5         | 0,513              | 0,027 | 0,594              | 0,023 | 0,608              | 0,008 | 0,652              | 0,021 | 0,647              | 0,029 | <b>0,049</b>                    | <b>0,049</b>       | <b>0,049</b>         | <b>0,049</b>        | 0,513              | <b>0,049</b>         | 0,127               | <b>0,049</b>    | 0,077          | 0,827            |
| 8           | 0,571              | 0,014 | 0,596              | 0,069 | 0,635              | 0,023 | 0,672              | 0,030 | 0,601              | 0,103 | 0,513                           | <b>0,049</b>       | <b>0,049</b>         | 0,513               | 0,827              | 0,127                | 0,513               | 0,127           | 0,827          | 0,275            |
| 8,5         | 0,586              | 0,017 | 0,446              | 0,033 | 0,494              | 0,082 | 0,469              | 0,024 | 0,438              | 0,052 | <b>0,049</b>                    | <b>0,049</b>       | <b>0,049</b>         | <b>0,049</b>        | 0,513              | 0,827                | 0,827               | 0,513           | 0,275          | 0,513            |
| 9           | 0,627              | 0,011 | 0,384              | 0,044 | 0,397              | 0,055 | 0,392              | 0,007 | 0,391              | 0,041 | <b>0,049</b>                    | <b>0,049</b>       | <b>0,049</b>         | <b>0,049</b>        | 0,827              | 0,513                | 0,827               | 0,827           | 0,827          | 0,513            |
| 9,5         | 0,642              | 0,032 | 0,382              | 0,073 | 0,385              | 0,021 | 0,402              | 0,037 | 0,399              | 0,052 | <b>0,049</b>                    | <b>0,049</b>       | <b>0,049</b>         | <b>0,049</b>        | 0,513              | 0,513                | 0,827               | 0,513           | 0,513          | 0,827            |
| 10          | 0,655              | 0,051 | 0,367              | 0,053 | 0,384              | 0,045 | 0,392              | 0,021 | 0,400              | 0,022 | <b>0,049</b>                    | <b>0,049</b>       | <b>0,049</b>         | <b>0,049</b>        | 0,827              | 0,513                | 0,513               | 0,827           | 0,827          | 0,658            |

Table 3: Antimicrobial activity of tears against *Pseudomonas aeruginosa* ATCC 27853 strain. The mean absorbance and SD values are indicated along with the calculated p-values from the Mann Whitney U-test. Bold values represent significant differences between the groups (p≤0,05).
